# Supplementary material
Source: PubMed Central journal article supplement (PMC6452893)

Adephagia

ZoeJ

TM4

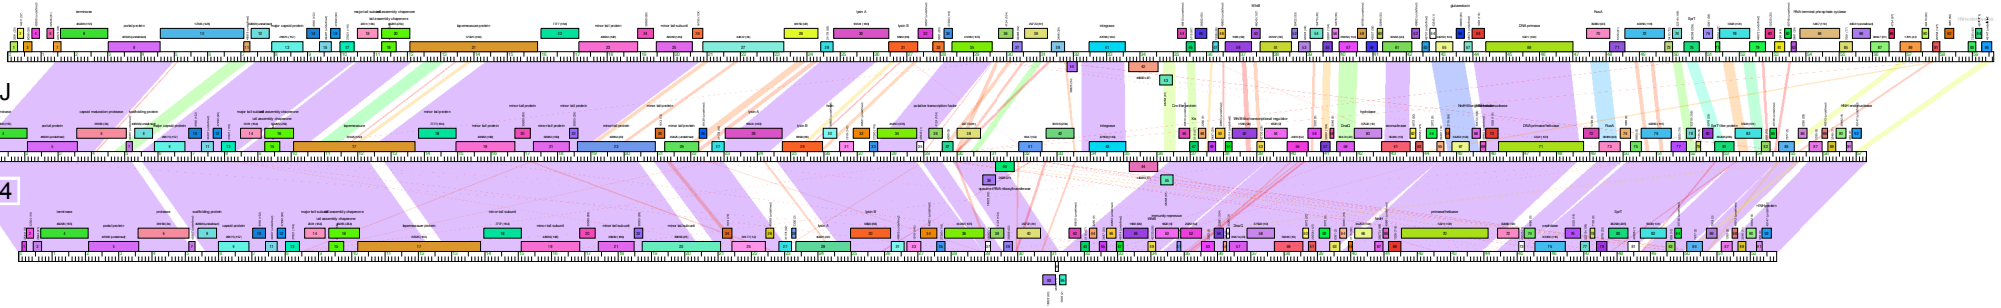

Figure S1

Supplement: NIHMS1519461-supplement-1.pdf [file NIHMS1519461-supplement-1.pdf]

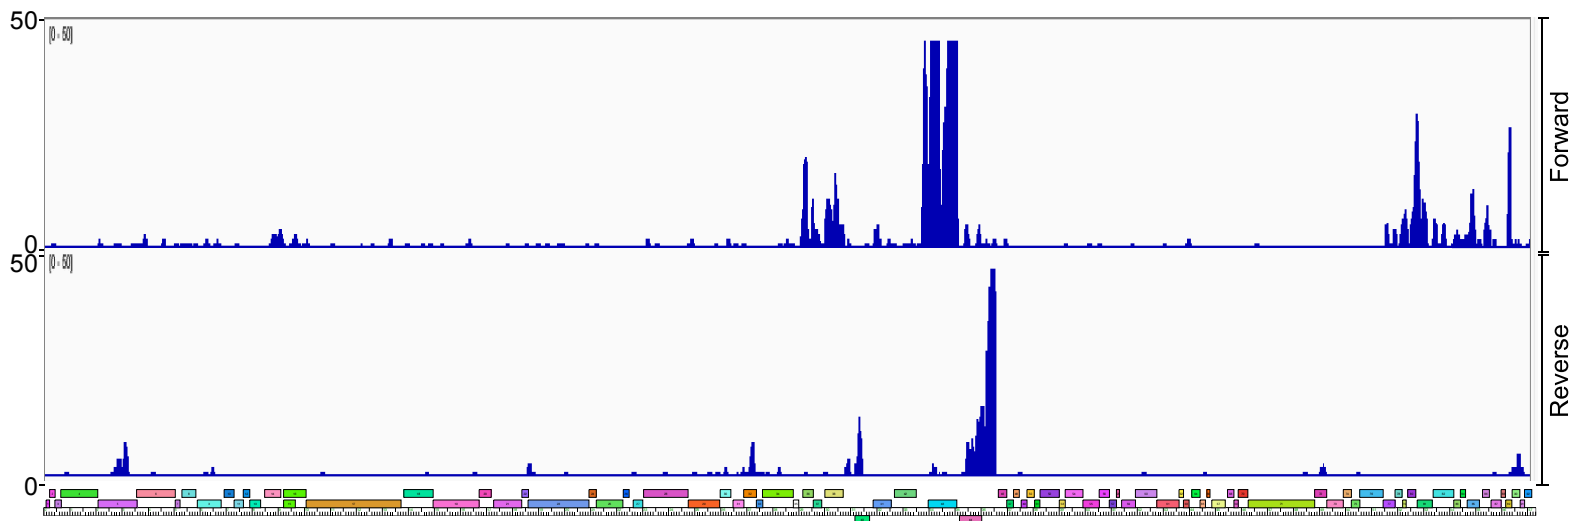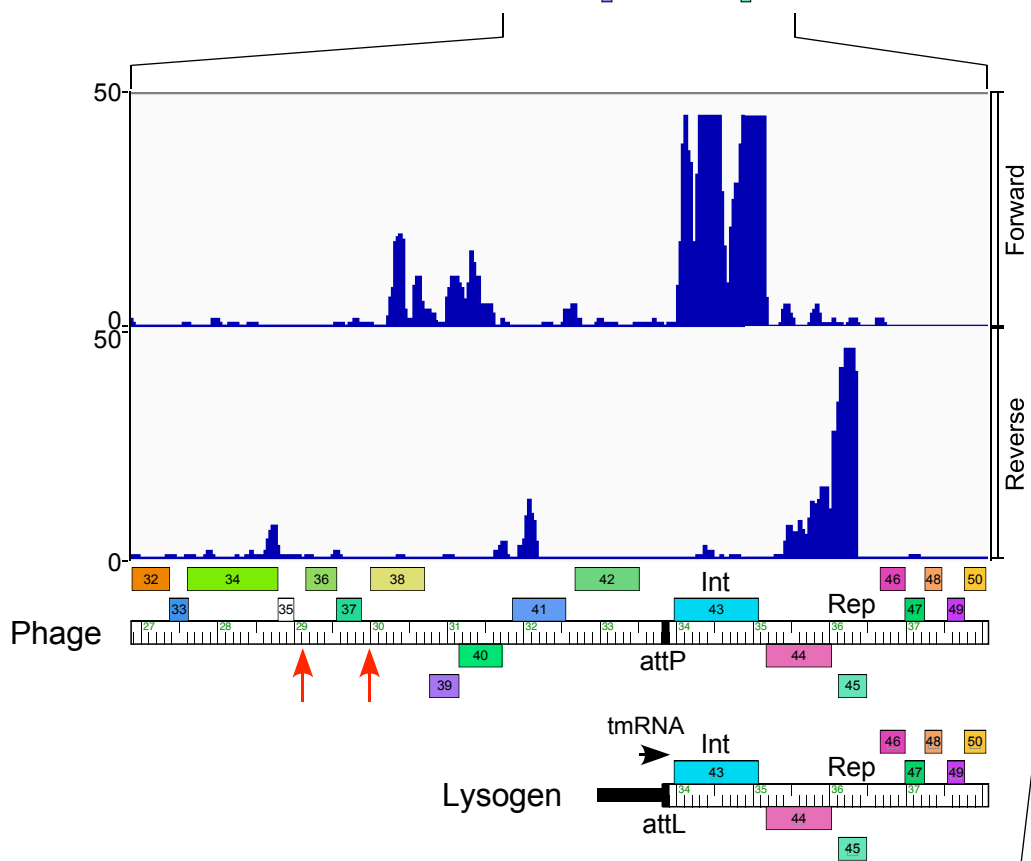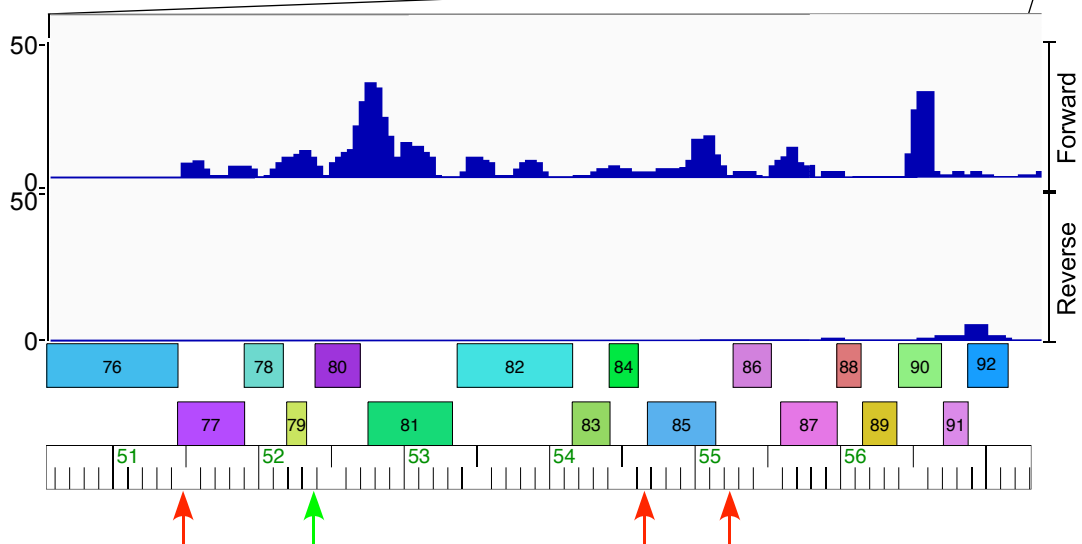

Figure S3

Supplement: NIHMS1519461-supplement-3.pdf [file NIHMS1519461-supplement-3.pdf]
